# Supplementary material
Source: Springer Nature journal article supplement (https://www.springermedizin.de/resource/supplementary/12937_2014_833_MOESM1_ESM.pdf/25654168)

### A) Hunger

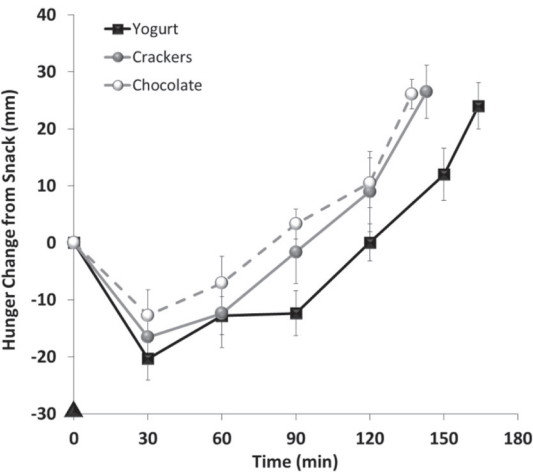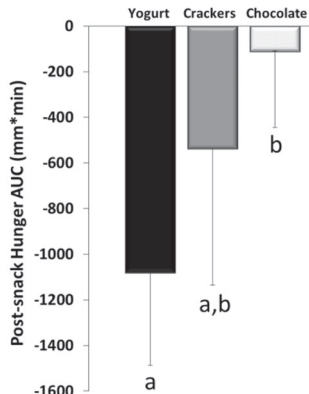

### B) Fullness

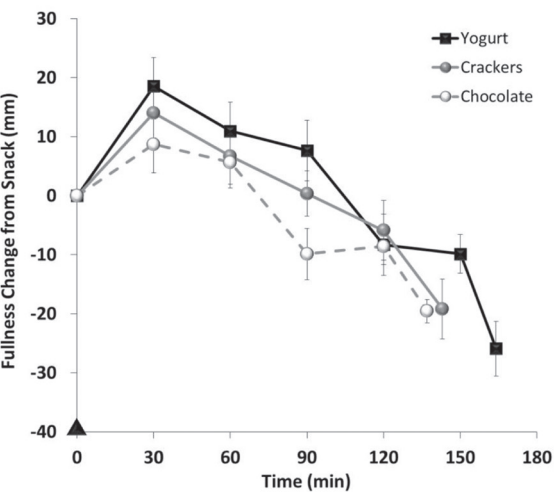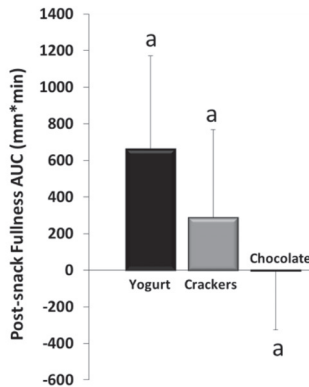

Supplement: MOESM1 [file 25654168]
